# Supplementary material
Source: publisher figshare collection journal article supplement (https://sage.figshare.com/ndownloader/files/14376044)
Supplement: Supplementary file 1 [file 14376044]

Suppl. Fig. 1

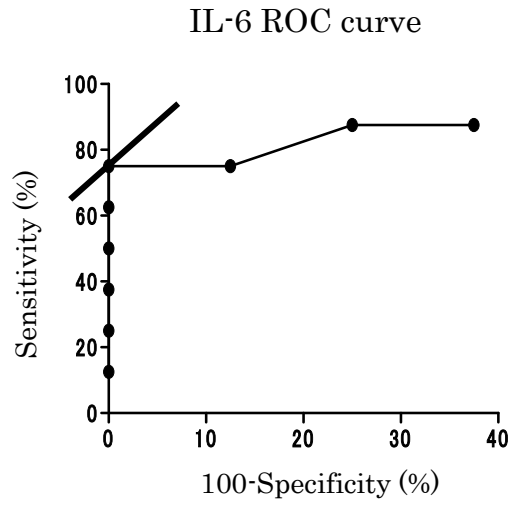

ROC curve with IL-6 in CSF to diagnose NPSLE. When the cut off value of OPN full in CSF was set as 74.9 pg/ml, sensitivity was 75.0% and specificity was 100% in the diagnosis of NPSLE. AUC: 0.89.

Suppl. Fig. 2

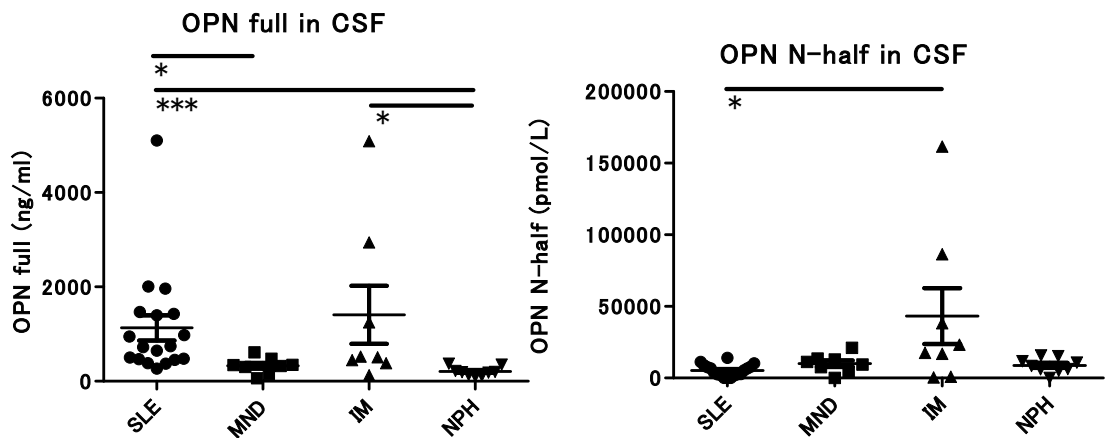

Concentration of OPN full and OPN N-half in CSF of SLE and other neurological diseases. \* $p < 0.05$ , \*\*\* $p < 0.001$  by Dunn's multiple comparison test. IM: infectious meningoencephalitis, MND: motor neuron disease, NPH: normal pressure hydrocephalus.

Suppl. Fig. 3

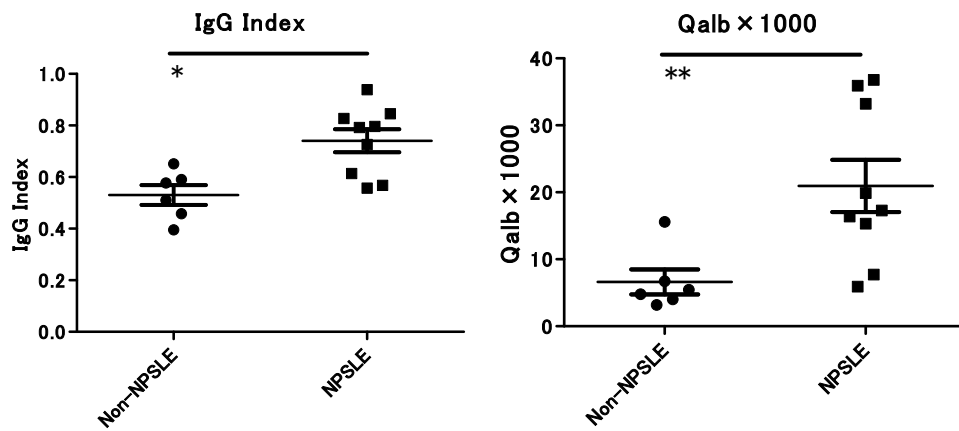

IgG index and Qalb in NPSLE. IgG index is calculated as  $( [CSF\ IgG] / [CSF\ Alb] ) / ( [Serum\ IgG] / [Serum\ Alb] )$ . Qalb is calculated as  $( [CSF\ Alb] / [Serum\ Alb] )$ . \* $p < 0.05$ , \*\* $p < 0.01$  by Mann-Whitney U test.

Suppl. Fig. 4

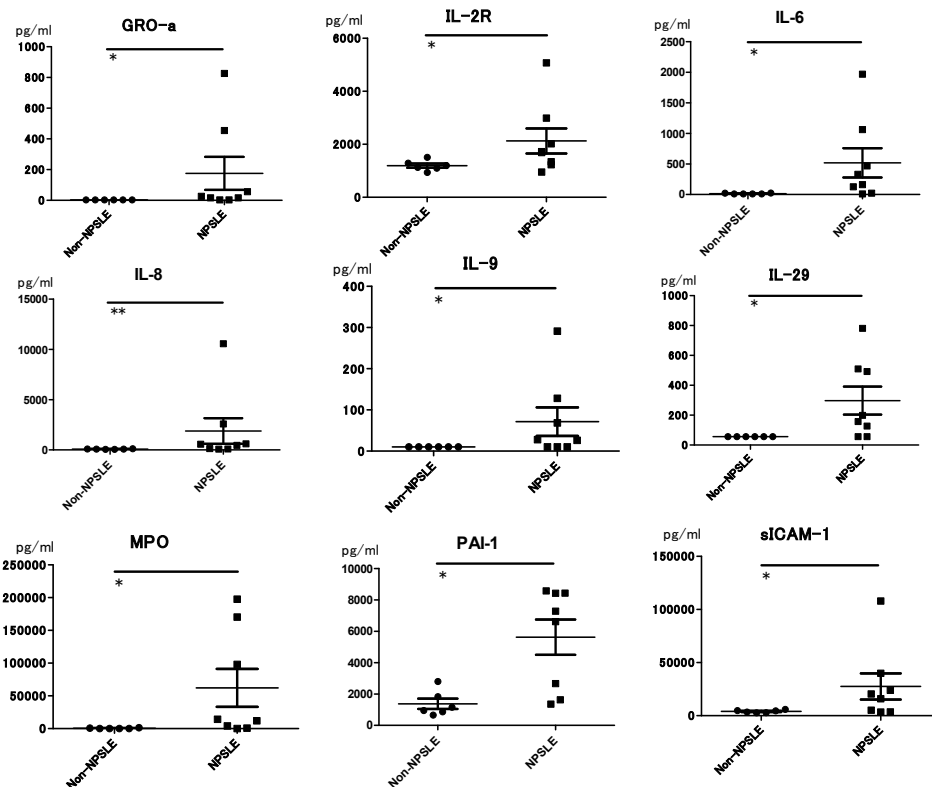

Cytokine and chemokine concentrations in CSF of non-NPSLE and NPSLE patients. In multiplex analysis, 41 of 67 molecules were measurable. Measurements of 9 molecules tended to be higher in NPSLE than in non-NPSLE patients. The p value for each Mann-Whitney U test (\* $p < 0.05$ , \*\* $p < 0.01$ ) is shown. However, significance could not be determined because the null hypothesis could not be rejected when Bonferroni's correction was performed for repeated testing of 41 measurable molecules. GRO-a: growth related oncogene-alpha, IL: interleukin, MPO: myeloperoxidase, PAI-1: plasminogen activator inhibitor-1, sICAM-1: soluble intercellular adhesion molecule-1.

Suppl. Fig. 5

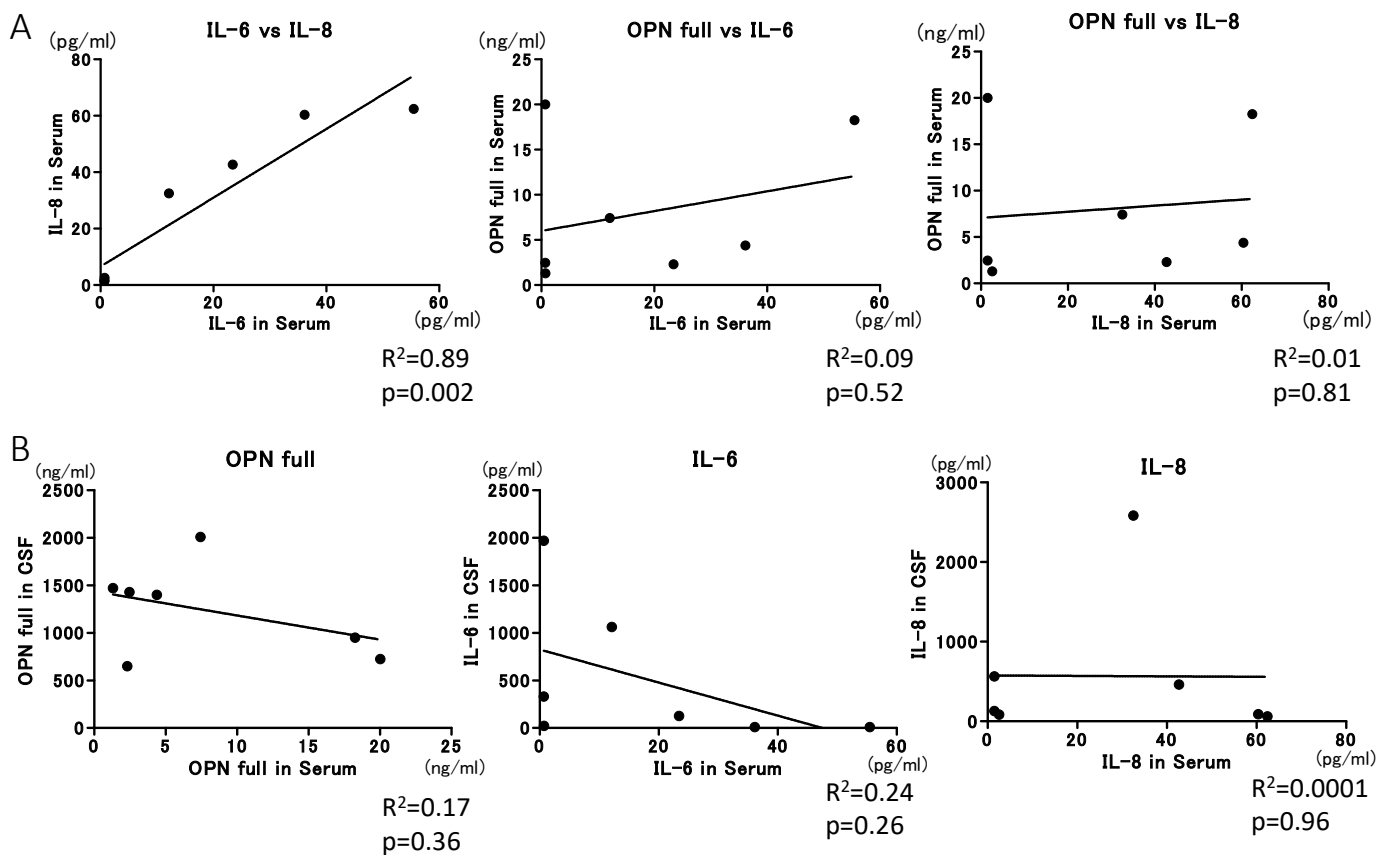

A: Correlation of IL-6, IL-8, and OPN full in sera of NPSLE and non-NPSLE by a linear progression analysis. There was a correlation between serum IL-6 and IL-8. However, serum OPN full did not correlate with serum IL-6 or IL-8.  
 B: Correlation of each cytokine level between serum and CSF. No significant correlations were found.

Suppl. Fig. 6

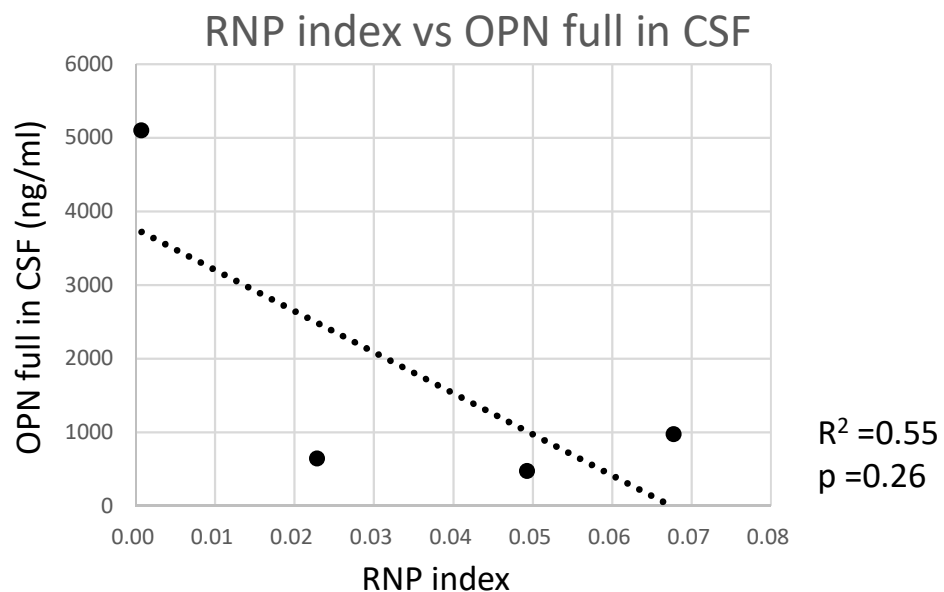

Correlation of OPN full in CSF with RNP index in NPSLE. In the present study, there were 4 patients whose anti-RNP antibody in CSF was positive. No significant correlation was found between OPN full in CSF and RNP index by a linear progression analysis. RNP index is calculated as  $([\text{CSF anti-U1 RNP antibodies}]/[\text{serum anti-U1 RNP antibodies}])/([\text{CSF IgG}/\text{serum IgG}])$ , according to the study by Sato et al<sup>20</sup>.

Suppl. Table 1. Classification of NPSLE

| NPSLE (N = 11) |                                                                    | ACR Classification of NPSLE* |
|----------------|--------------------------------------------------------------------|------------------------------|
| No.1           | Psychosis, Seizure disorders                                       |                              |
| No.2           | Acute confusional state, Demyelinating syndrome, Seizure disorders |                              |
| No.3           | Cognitive dysfunction, Mood disorder                               |                              |
| No.4           | Acute confusional state                                            |                              |
| No.5           | Demyelinating syndrome, Polyneuropathy                             |                              |
| No.6           | Acute confusional state, Demyelinating syndrome                    |                              |
| No.7           | Headache                                                           |                              |
| No.8           | Acute confusional state, Psychosis, Seizure disorders              |                              |
| No.9           | Aseptic meningitis                                                 |                              |
| No.10          | Demyelinating syndrome                                             |                              |
| No.11          | Acute confusional state, Psychosis                                 |                              |

\*Arthritis Rheum. 1999; 42: 599-608.

Suppl. Table 2. Diagnosis of non-NPSLE

| Non-NPSLE<br>(N = 7) | Diagnosis                            | OPN<br>measurement    | Multiplex<br>analysis |
|----------------------|--------------------------------------|-----------------------|-----------------------|
| No. 1                | Dizziness due to anemia              | <input type="radio"/> | <input type="radio"/> |
|                      | Mononeuropathy due to cubital tunnel | <input type="radio"/> | <input type="radio"/> |
| No. 2                | Depression                           | <input type="radio"/> | <input type="radio"/> |
| No. 3                | Temporal lobe epilepsy               | <input type="radio"/> | <input type="radio"/> |
| No. 4                | Depression                           | <input type="radio"/> |                       |
| No. 5                | Neurosis                             | <input type="radio"/> | <input type="radio"/> |
| No. 6                | Steroid myopathy                     | <input type="radio"/> | <input type="radio"/> |

Suppl. Table 3. Profiles of patients whose OPN, cytokine, and chemokine levels in the CSF were examined

|                                   | Non-NPSLE <sup>1)</sup><br>(N = 6) | NPSLE<br>(N = 8)              |
|-----------------------------------|------------------------------------|-------------------------------|
| Age                               | 47.2 ± 19.2                        | 35.0 ± 15.0                   |
| Sex ratio<br>(male : female)      | 0:6                                | 1:7                           |
| Anti-dsDNA Ab (IU/L)<br>(Min-max) | 8.5 ± 14.1<br>(0 - 37)             | 62.5 ± 104.5<br>(0 - 300)     |
| SLEDAI<br>(Min-max)               | 2.3 ± 3.9<br>(0 - 10)              | 17.9 ± 6.0<br>(10 - 26)       |
| PSL (mg/day)                      | 8.8 ± 6.6                          | 8.7 ± 4.7                     |
| Immunosuppressants                | TAC:1                              | AZA:1<br>MZB:1<br>CyA + MZB:1 |

<sup>1)</sup>SLE patients without NPSLE. Values are expressed as means ± SD and ranges (minimum to maximum). Ab: antibody, AZA: azathioprine, CyA: ciclosporin A, MZB: mizoribine, NPSLE: neuropsychiatric SLE, PSL: prednisolone, SLE: systemic lupus erythematosus, SLEDAI: SLE disease activity index, TAC: tacrolimus.
